# Supplementary material for: Evaluating Practice-Based Education and OSCEs in Paramedic Mental Health Training: Effects on Confidence and Simulated Performance
Source: Research Square preprint supplement (doi:10.21203/rs.3.rs-6753971/v1), 2025-07-07
Supplement: Supplementary file 1 [file b2ba88ea7058489c19880c97.docx]

Student Number:

Gender:

Age:

The following statements relate to your perceived level of CONFIDENCE in assessing and managing patients with mental health conditions.

**1. Please indicate in the table below how you *felt* about each statement THEN, at the beginning of semester (Week1), and how you *feel* about each statement NOW, at the end of the semester (Week 12).**

1 = Strongly Disagree; 2 = Disagree; 3 = Neither agree nor disagree; 4 = Agree; 5 = Strongly agree

| **Then**  How you felt week 1 | | | | | **Statement**  Relevant to patients experiencing mental health conditions | **Now**  How you feel week 12 | | | | |
| --- | --- | --- | --- | --- | --- | --- | --- | --- | --- | --- |
| **SD D N A SA** | | | | | **ASSESSMENT**  I felt/feel confident in my ability to: | **SD D N A SA** | | | | |
| 1 | 2 | 3 | 4 | 5 | 1 | 2 | 3 | 4 | 5 |
|  |  |  |  |  | Perform a Mental Status Assessment (MSA) |  |  |  |  |  |
|  |  |  |  |  | Use the SAT tool to determine need for sedation |  |  |  |  |  |
|  |  |  |  |  | Conduct a suicide risk assessment |  |  |  |  |  |
|  | | | | | **COMMUNICATION**  I felt/feel confident in my ability to: |  | | | | |
| 1 | 2 | 3 | 4 | 5 | 1 | 2 | 3 | 4 | 5 |
|  |  |  |  |  | Conduct a patient centred interview |  |  |  |  |  |
|  |  |  |  |  | Gather relevant history |  |  |  |  |  |
|  |  |  |  |  | Communicate effectively |  |  |  |  |  |
|  |  |  |  |  | Develop rapport |  |  |  |  |  |
|  | | | | | **MANAGEMENT**  I felt/feel confident in my ability to: |  | | | | |
| 1 | 2 | 3 | 4 | 5 | 1 | 2 | 3 | 4 | 5 |
|  |  |  |  |  | Treat with pharmacological means |  |  |  |  |  |
|  |  |  |  |  | Treat with non-pharmacological means |  |  |  |  |  |
|  |  |  |  |  | Provide and discuss alternate referral pathways (e.g. TelePROMPT) |  |  |  |  |  |

This semester we have incorporated a practical based approach including an OSCE to the teaching and learning of the assessment and management of patients with mental health conditions.

**2. Please indicate on the scale below the level of impact you feel the practical based approach to teaching and learning the assessment and management of patients with mental health conditions had on your confidence in the listed areas.**

0 = Not at all - 10 = A great deal

| **Statement**  Relevant to patients experiencing mental health conditions | **IMPACT of Practical Based Learning on Confidence** |
| --- | --- |
| **ASSESSMENT** | **Not at all A great deal** |
| Perform a Mental Status Assessment (MSA) | 0 1 2 3 4 5 6 7 8 9 10 |
| Use the SAT tool to determine need for sedation | 0 1 2 3 4 5 6 7 8 9 10 |
| Conduct a suicide risk assessment | 0 1 2 3 4 5 6 7 8 9 10 |
| **COMMUNICATION** | **Not at all A great deal** |
| Conduct a patient centred interview | 0 1 2 3 4 5 6 7 8 9 10 |
| Gather relevant history | 0 1 2 3 4 5 6 7 8 9 10 |
| Communicate effectively | 0 1 2 3 4 5 6 7 8 9 10 |
| Develop rapport | 0 1 2 3 4 5 6 7 8 9 10 |
| **MANAGEMENT** | **Not at all A great deal** |
| Treat with pharmacological means | 0 1 2 3 4 5 6 7 8 9 10 |
| Treat with non-pharmacological means | 0 1 2 3 4 5 6 7 8 9 10 |
| Provide and discuss alternate referral pathways (e.g. TelePROMPT) | 0 1 2 3 4 5 6 7 8 9 10 |

**3. How and why do you think the practical based teaching approach impacted your confidence in assessing and managing patients with mental health conditions?**

|  |
| --- |
|  |
|  |
|  |
|  |
|  |

*Your competence in assessing and managing a patient with mental health conditions will be measured via your OSCE results.*

**4. How and why do you think the practical based teaching approach impacted your competence (OSCE performance) in assessing and managing patients with mental health conditions?**

|  |
| --- |
|  |
|  |
|  |
|  |
|  |
|  |

**Feel free to provide any additional feedback on the practical based approach to this unit and how you feel it prepared you to assess and manage patients with mental health conditions**.

|  |
| --- |
|  |
|  |
|  |
|  |
|  |
|  |

Thank you for you time and feedback
